# Supplementary material for: Wildlife-Friendly Livestock Management Promotes Mammalian Biodiversity Recovery on a Semi-Arid Karoo Farm in South Africa
Source: Frontiers journal article supplement (doi:10.3389/fcosc.2021.652415), 2021-04-14
Supplement: Data_Sheet_1.docx [file Data_Sheet_1.docx]

**Supplementary Information**

***Supplementary Table 1****. Summary of the study sites and survey period data..*

| Study Site | Area  (ha) | Survey  Period | Camera Stations  Deployed | Camera Stations  Analysed | Density  (ha/camera) | Average Camera Spacing (m) | Survey Effort (nights) | Capture Events | Species  Detected |
| --- | --- | --- | --- | --- | --- | --- | --- | --- | --- |
| Wildlife-friendly | 22111 | 2016 | 29 | 16 | 762.4 | 1834.0 | 2806 | 2118 | 28 |
| Wildlife-friendly | 22111 | 2017 | 29 | 16 | 762.4 | 1834.0 | 2761 | 2364 | 30 |
| Wildlife-friendly | 22111 | 2018 | 29 | 16 | 762.4 | 1834.0 | 2619 | 2693 | 32 |
| Wildlife-friendly | 22111 | 2019 | 29 | 16 | 762.4 | 1834.0 | 2746 | 3031 | 34 |
| Traditional | 11244 | 2019 | 13 | 10 | 864.9 | 2333.0 | 1539 | 1372 | 23 |
| Game | 5435 | 2019 | 6 | 3 | 905.8 | 1321.0 | 297 | 695 | 24 |

***Supplementary Table 2****. Species detected on the wildlife-friendly, traditional livestock and game farms in 2019.*

| **Species Number** | **Wildlife-friendly Farm** | **Game Farm** | **Traditional Farm** |
| --- | --- | --- | --- |
| 1 | Aardvark | Aardvark | Aardvark |
| 2 | Aardwolf | Aardwolf | Aardwolf |
| 3 | Baboon | Baboon | Baboon |
| 4 | Black-backed Jackal | Black-backed Jackal | Black-backed Jackal |
| 5 | Caracal | Caracal | Caracal |
| 6 | Duiker - Common | Duiker - Common | Duiker - Common |
| 7 | Gemsbok | Gemsbok | Gemsbok |
| 8 | Kudu | Kudu | Kudu |
| 9 | Mongoose - Small grey | Mongoose - Small grey | Mongoose - Small grey |
| 10 | Porcupine | Porcupine | Porcupine |
| 11 | Scrub Hare | Scrub Hare | Scrub Hare |
| 12 | Springbok | Springbok | Springbok |
| 13 | Steenbok | Steenbok | Steenbok |
| 14 | Vervet Monkey | Vervet Monkey | Vervet Monkey |
| 15 | Eland | Eland | - |
| 16 | Genet - Small Spotted | Genet - Small Spotted | - |
| 17 | Mongoose - Water | Mongoose - Water | - |
| 18 | Red Hartebeest | Red Hartebeest | - |
| 19 | Striped Polecat | Striped Polecat | - |
| 20 | Waterbuck | Waterbuck | - |
| 21 | Wildebeest - Blue | Wildebeest - Blue | - |
| 22 | African Wild Cat | - | African Wild Cat |
| 23 | Bat-eared Fox | - | Bat-eared Fox |
| 24 | Cape Fox | - | Cape Fox |
| 25 | Dassie | - | Dassie |
| 26 | Honey Badger | - | Honey Badger |
| 27 | Klipspringer | - | Klipspringer |
| 28 | Mountain Reedbuck | - | Mountain Reedbuck |
| 29 | Zebra - Plains | - | Zebra - Plains |
| 30 | Blesbok | - | - |
| 31 | Grey Rhebok | - | - |
| 32 | Ground Squirrel | - | - |
| 33 | Mongoose - Yellow | - | - |
| 34 | Gerbil - Highveld | - | - |
| 35 | - | Giraffe | - |
| 36 | - | Otter | - |
| 37 | - | Zebra - Cape Mountain | - |
| 38 | - | - | Leopard |
